# Supplementary material
Source: PubMed Central journal article supplement (PMC122697)
Supplement: pnas_012540799_1.pdf [file pnas_012540799_1.pdf]

**Table 2. Atomic coordinates and  $U_{eq}$  for 3a**

| Atom | x         | y          | z         | $U_{eq}$ |
|------|-----------|------------|-----------|----------|
| C1   | 0.5856(6) | 0.2586(6)  | 0.1703(4) | 0.035(3) |
| C2   | 0.5600(6) | 0.3297(6)  | 0.1529(4) | 0.033(3) |
| C3   | 0.5991(6) | 0.3458(6)  | 0.1069(4) | 0.026(2) |
| C4   | 0.6640(7) | 0.2866(7)  | 0.0804(4) | 0.039(3) |
| C5   | 0.6839(7) | 0.2177(6)  | 0.0989(4) | 0.043(3) |
| C6   | 0.6945(7) | 0.5278(6)  | 0.0669(4) | 0.041(3) |
| C7   | 0.6528(6) | 0.4975(6)  | 0.0570(4) | 0.033(3) |
| C8   | 0.6296(6) | 0.4512(5)  | 0.0920(4) | 0.027(2) |
| C9   | 0.6492(6) | 0.4387(6)  | 0.1352(4) | 0.033(3) |
| C10  | 0.6886(6) | 0.4723(6)  | 0.1421(4) | 0.036(3) |
| C11  | 0.3695(7) | 0.5594(7)  | 0.0942(4) | 0.039(3) |
| C12  | 0.4455(6) | 0.5075(6)  | 0.0756(4) | 0.029(2) |
| C13  | 0.4956(6) | 0.4777(5)  | 0.1043(4) | 0.026(2) |
| C14  | 0.4638(6) | 0.5056(6)  | 0.1516(4) | 0.030(2) |
| C15  | 0.3875(6) | 0.5551(6)  | 0.1682(4) | 0.032(2) |
| C16  | 0.5795(6) | 0.4217(5)  | 0.0839(3) | 0.023(2) |
| C17  | 0.5589(7) | 0.2630(6)  | 0.3507(4) | 0.040(3) |
| C18  | 0.5420(7) | 0.3311(6)  | 0.3622(4) | 0.042(3) |
| C19  | 0.4859(6) | 0.3643(6)  | 0.4061(4) | 0.033(3) |
| C20  | 0.4506(7) | 0.3219(7)  | 0.4359(4) | 0.045(3) |
| C21  | 0.4741(8) | 0.2527(7)  | 0.4228(4) | 0.045(3) |
| C22  | 0.2533(7) | 0.5917(7)  | 0.4327(4) | 0.043(3) |
| C23  | 0.3223(6) | 0.5446(6)  | 0.4435(4) | 0.036(3) |
| C24  | 0.3817(6) | 0.4903(6)  | 0.4111(4) | 0.028(2) |
| C25  | 0.3701(6) | 0.4855(6)  | 0.3690(4) | 0.032(3) |
| C26  | 0.3016(7) | 0.5329(7)  | 0.3598(4) | 0.038(3) |
| C27  | 0.6014(7) | 0.5168(6)  | 0.4011(4) | 0.038(3) |
| C28  | 0.5502(6) | 0.4869(6)  | 0.4236(4) | 0.032(3) |
| C29  | 0.5154(6) | 0.4728(5)  | 0.3971(4) | 0.025(2) |
| C30  | 0.5317(7) | 0.4915(6)  | 0.3476(4) | 0.035(3) |
| C31  | 0.5859(7) | 0.5174(6)  | 0.3273(4) | 0.039(3) |
| C32  | 0.4577(6) | 0.4406(6)  | 0.4219(3) | 0.026(2) |
| C33  | 0.7589(7) | -0.0622(7) | 0.1452(5) | 0.048(3) |
| C34  | 0.7858(7) | -0.1397(7) | 0.1497(5) | 0.048(3) |
| C35  | 0.7730(7) | -0.1710(7) | 0.1947(5) | 0.045(3) |
| C36  | 0.7360(6) | -0.1276(5) | 0.2383(4) | 0.030(2) |
| C37  | 0.7288(7) | -0.1586(6) | 0.2830(4) | 0.039(3) |
| C38  | 0.6940(7) | -0.1206(6) | 0.3256(5) | 0.039(3) |
| C39  | 0.6870(7) | -0.1572(7) | 0.3732(4) | 0.043(3) |
| C40  | 0.6433(8) | -0.1158(7) | 0.4130(5) | 0.050(3) |
| C41  | 0.6071(8) | -0.0388(7) | 0.4108(5) | 0.054(4) |
| C42  | 0.6177(7) | -0.0002(6) | 0.3673(5) | 0.043(3) |
| C43  | 0.6595(7) | -0.0408(6) | 0.3235(5) | 0.038(3) |
| C44  | 0.6701(6) | -0.0090(6) | 0.2757(4) | 0.035(3) |
| C45  | 0.7067(6) | -0.0485(6) | 0.2332(4) | 0.035(3) |
| C46  | 0.7186(7) | -0.0160(6) | 0.1842(4) | 0.038(3) |
| C47  | 0.8393(6) | 0.6134(6)  | 0.1199(4) | 0.032(2) |
| C48  | 0.8758(7) | 0.6357(7)  | 0.0763(4) | 0.043(3) |
| C49  | 0.9282(7) | 0.6641(7)  | 0.0711(4) | 0.044(3) |
| C50  | 0.9444(6) | 0.6702(6)  | 0.1097(4) | 0.035(3) |
| C51  | 0.9079(6) | 0.6511(6)  | 0.1579(4) | 0.030(2) |
| C52  | 0.9222(6) | 0.6604(6)  | 0.1985(4) | 0.031(2) |
| C53  | 0.8819(6) | 0.6484(6)  | 0.2445(4) | 0.027(2) |
| C54  | 0.8957(6) | 0.6628(6)  | 0.2870(4) | 0.033(3) |
| C55  | 0.8516(6) | 0.6567(6)  | 0.3326(4) | 0.033(3) |
| C56  | 0.7949(6) | 0.6327(6)  | 0.3394(4) | 0.036(3) |
| C57  | 0.7792(6) | 0.6154(6)  | 0.3033(4) | 0.030(2) |

|      |            |            |            |           |
|------|------------|------------|------------|-----------|
| C58  | 0.8235(6)  | 0.6235(6)  | 0.2527(4)  | 0.026(2)  |
| C59  | 0.8118(6)  | 0.6116(6)  | 0.2113(4)  | 0.030(2)  |
| C60  | 0.8521(6)  | 0.6234(6)  | 0.1635(4)  | 0.028(2)  |
| C61  | 0.1018(6)  | 0.7245(6)  | 0.1835(4)  | 0.030(2)  |
| C62  | 0.0751(7)  | 0.7511(6)  | 0.1453(4)  | 0.037(3)  |
| C63  | -0.0028(7) | 0.8018(6)  | 0.1491(4)  | 0.040(3)  |
| C64  | -0.0552(7) | 0.8273(6)  | 0.1939(4)  | 0.038(3)  |
| C65  | -0.0319(6) | 0.8004(6)  | 0.2361(4)  | 0.030(2)  |
| C66  | -0.0860(7) | 0.8223(6)  | 0.2809(4)  | 0.038(3)  |
| C67  | -0.0666(6) | 0.7970(6)  | 0.3240(4)  | 0.033(3)  |
| C68  | -0.1253(7) | 0.8167(7)  | 0.3716(5)  | 0.048(3)  |
| C69  | -0.1076(7) | 0.7978(7)  | 0.4136(5)  | 0.046(3)  |
| C70  | -0.0301(7) | 0.7546(7)  | 0.4113(4)  | 0.048(3)  |
| C71  | 0.0326(6)  | 0.7255(6)  | 0.3671(4)  | 0.039(3)  |
| C72  | 0.0135(6)  | 0.7475(6)  | 0.3224(4)  | 0.032(3)  |
| C73  | 0.0673(6)  | 0.7250(6)  | 0.2768(4)  | 0.028(2)  |
| C74  | 0.0472(6)  | 0.7489(5)  | 0.2319(4)  | 0.029(2)  |
| C75  | 0.6241(9)  | 0.0397(8)  | 0.0896(5)  | 0.061(4)  |
| C76  | 0.6679(10) | 0.0687(10) | 0.0491(6)  | 0.086(5)  |
| C77  | 0.5358(8)  | 0.0376(7)  | 0.1927(6)  | 0.062(4)  |
| C78  | 0.4746(10) | 0.0272(8)  | 0.1786(7)  | 0.086(6)  |
| C79  | 0.5070(7)  | 0.1730(7)  | 0.1342(5)  | 0.050(3)  |
| C80  | 0.4420(8)  | 0.2170(8)  | 0.1762(5)  | 0.065(4)  |
| C81  | 0.8807(10) | 0.0160(11) | 0.1290(7)  | 0.091(6)  |
| C82  | 0.8737(13) | 0.0316(11) | 0.0775(8)  | 0.135(9)  |
| C83  | 0.8161(8)  | 0.0399(8)  | 0.2315(5)  | 0.061(4)  |
| C84  | 0.8948(9)  | 0.0240(11) | 0.2341(7)  | 0.095(6)  |
| C85  | 0.8123(10) | 0.1600(9)  | 0.1638(7)  | 0.082(6)  |
| C86  | 0.7559(12) | 0.2187(10) | 0.2045(7)  | 0.101(6)  |
| C87  | 0.9621(13) | 0.4423(11) | 0.1353(12) | 0.166(14) |
| C88  | 1.0304(19) | 0.426(3)   | 0.1193(15) | 0.41(4)   |
| C89  | 0.9372(17) | 0.4560(16) | 0.0342(16) | 0.32(3)   |
| C90  | 0.8918(11) | 0.4674(17) | 0.0035(9)  | 0.137(12) |
| C91  | 0.8744(12) | 0.3768(8)  | 0.1188(12) | 0.135(11) |
| C92  | 0.903(4)   | 0.332(3)   | 0.140(2)   | 0.44(2)   |
| C93  | 0.6775(9)  | 0.7525(8)  | 0.1480(6)  | 0.066(4)  |
| C94  | 0.6101(9)  | 0.8281(8)  | 0.1529(7)  | 0.081(5)  |
| C95  | 0.5800(11) | 0.6783(12) | 0.1851(8)  | 0.122(8)  |
| C96  | 0.5365(11) | 0.6468(12) | 0.1806(9)  | 0.126(9)  |
| C97  | 0.6195(13) | 0.7121(10) | 0.0866(9)  | 0.136(11) |
| C98  | 0.6903(17) | 0.7174(13) | 0.0329(8)  | 0.153(12) |
| C99  | 0.2178(8)  | 0.8050(8)  | 0.0945(5)  | 0.059(4)  |
| C100 | 0.2639(9)  | 0.7578(8)  | 0.0506(5)  | 0.070(4)  |
| C101 | 0.3400(8)  | 0.7381(8)  | 0.1371(6)  | 0.066(4)  |
| C102 | 0.3613(9)  | 0.8006(8)  | 0.1156(6)  | 0.070(4)  |
| C103 | 0.1827(9)  | 0.8272(8)  | 0.1961(6)  | 0.072(5)  |
| C104 | 0.1132(11) | 0.8882(10) | 0.1902(7)  | 0.105(7)  |
| C105 | 0.1446(8)  | 0.5651(8)  | 0.1277(5)  | 0.057(4)  |
| C106 | 0.1988(9)  | 0.5655(10) | 0.0754(5)  | 0.083(6)  |
| C107 | 0.1166(7)  | 0.5546(7)  | 0.2319(5)  | 0.051(3)  |
| C108 | 0.0892(8)  | 0.4967(8)  | 0.2360(6)  | 0.072(5)  |
| C109 | 0.2689(8)  | 0.4660(7)  | 0.1664(5)  | 0.056(4)  |
| C110 | 0.3040(8)  | 0.4395(8)  | 0.2079(6)  | 0.074(5)  |
| C111 | 0.6562(12) | 0.0543(10) | 0.4650(6)  | 0.093(6)  |
| C112 | 0.5731(12) | 0.1086(11) | 0.5003(7)  | 0.106(7)  |
| C113 | 0.7671(9)  | 0.0093(8)  | 0.3684(7)  | 0.086(6)  |
| C114 | 0.8347(11) | -0.0099(9) | 0.3904(10) | 0.139(10) |
| C115 | 0.6963(9)  | 0.1614(8)  | 0.3999(6)  | 0.067(4)  |
| C116 | 0.7407(9)  | 0.1800(8)  | 0.3506(6)  | 0.078(5)  |
| C117 | 0.4736(9)  | 0.0390(8)  | 0.3337(6)  | 0.063(4)  |
| C118 | 0.4022(9)  | 0.0447(9)  | 0.3272(6)  | 0.080(5)  |
| C119 | 0.3794(9)  | 0.1581(9)  | 0.4029(5)  | 0.068(4)  |

|      |            |            |            |           |
|------|------------|------------|------------|-----------|
| C120 | 0.3827(10) | 0.1053(9)  | 0.4481(6)  | 0.080(5)  |
| C121 | 0.4465(9)  | 0.1839(8)  | 0.3018(6)  | 0.068(4)  |
| C122 | 0.4124(13) | 0.2645(9)  | 0.3111(7)  | 0.110(7)  |
| C123 | 0.0209(8)  | 0.5778(8)  | 0.3709(5)  | 0.055(4)  |
| C124 | -0.0097(8) | 0.5218(8)  | 0.3881(5)  | 0.058(4)  |
| C125 | 0.0344(8)  | 0.5809(8)  | 0.4664(4)  | 0.054(4)  |
| C126 | 0.0754(10) | 0.5887(9)  | 0.4981(5)  | 0.077(5)  |
| C127 | 0.1617(8)  | 0.4770(7)  | 0.3948(5)  | 0.057(4)  |
| C128 | 0.2022(9)  | 0.4519(8)  | 0.3433(6)  | 0.071(4)  |
| C129 | 0.1045(9)  | 0.8373(7)  | 0.3350(6)  | 0.062(4)  |
| C130 | 0.1234(11) | 0.8997(9)  | 0.3253(7)  | 0.096(6)  |
| C131 | 0.2691(16) | 0.7240(16) | 0.3195(17) | 0.27(3)   |
| C132 | 0.300(2)   | 0.687(2)   | 0.2828(9)  | 0.25(2)   |
| C133 | 0.191(2)   | 0.7751(14) | 0.4053(15) | 0.23(2)   |
| C134 | 0.126(3)   | 0.796(3)   | 0.4468(12) | 0.33(4)   |
| C135 | 0.5924(10) | 0.7379(10) | 0.3867(5)  | 0.080(5)  |
| C136 | 0.5818(10) | 0.6951(10) | 0.4339(6)  | 0.089(6)  |
| C137 | 0.6123(9)  | 0.7600(8)  | 0.2859(6)  | 0.071(4)  |
| C138 | 0.5554(9)  | 0.8429(8)  | 0.2965(6)  | 0.074(5)  |
| C139 | 0.5023(10) | 0.7020(10) | 0.3457(10) | 0.144(11) |
| C140 | 0.456(3)   | 0.720(5)   | 0.328(3)   | 0.90(8)   |
| C141 | 0.8916(10) | 0.4434(11) | 0.2763(9)  | 0.183(15) |
| C142 | 0.9583(12) | 0.3670(11) | 0.2707(10) | 0.181(14) |
| C143 | 0.7849(14) | 0.3846(11) | 0.3227(13) | 0.178(15) |
| C144 | 0.7657(14) | 0.3708(14) | 0.2890(10) | 0.165(12) |
| C145 | 0.830(2)   | 0.440(2)   | 0.3718(14) | 0.36(4)   |
| C146 | 0.7937(11) | 0.4630(12) | 0.4201(7)  | 0.107(7)  |
| F1   | 0.6585(14) | 0.0371(13) | 0.7527(11) | 0.319(16) |
| F2   | 0.5694(11) | 0.1492(16) | 0.7513(8)  | 0.275(13) |
| F3   | 0.5973(11) | 0.1114(12) | 0.8146(6)  | 0.211(9)  |
| F4   | 0.6862(10) | 0.1249(11) | 0.7076(5)  | 0.183(7)  |
| F5   | 0.7183(8)  | 0.0855(10) | 0.7764(6)  | 0.183(7)  |
| F6   | 0.6351(13) | 0.1883(10) | 0.7712(7)  | 0.213(8)  |
| F7   | 0.8419(9)  | 0.2840(10) | 0.0520(6)  | 0.188(7)  |
| F8   | 0.8554(9)  | 0.1942(10) | 0.0213(8)  | 0.210(8)  |
| F9   | 0.8860(18) | 0.2722(11) | -0.0264(7) | 0.276(13) |
| F10  | 0.9437(11) | 0.1729(12) | 0.0524(6)  | 0.222(10) |
| F11  | 0.9566(11) | 0.2669(10) | 0.0101(7)  | 0.220(9)  |
| F12  | 0.9761(13) | 0.1701(10) | -0.0248(6) | 0.242(11) |
| F13  | 0.6331(8)  | 0.3158(6)  | 0.4446(4)  | 0.122(4)  |
| F14  | 0.6291(8)  | 0.2442(6)  | 0.5092(4)  | 0.128(5)  |
| F15  | 0.5702(6)  | 0.3645(6)  | 0.5163(4)  | 0.107(3)  |
| F16  | 0.7378(7)  | 0.2451(7)  | 0.4664(5)  | 0.150(5)  |
| F17  | 0.6773(7)  | 0.3699(6)  | 0.4749(4)  | 0.109(4)  |
| F18  | 0.6719(9)  | 0.2987(6)  | 0.5410(5)  | 0.144(5)  |
| F19  | 0.4627(7)  | 0.3177(6)  | -0.0253(3) | 0.102(3)  |
| F20  | 0.5113(6)  | 0.3732(5)  | 0.0007(3)  | 0.088(3)  |
| F21  | 0.5417(6)  | 0.2551(5)  | 0.0188(4)  | 0.109(4)  |
| F22  | 0.3893(5)  | 0.3999(6)  | 0.0337(4)  | 0.120(4)  |
| F23  | 0.4200(7)  | 0.2816(6)  | 0.0533(4)  | 0.113(4)  |
| F24  | 0.4686(7)  | 0.3379(5)  | 0.0770(3)  | 0.096(3)  |
| F25  | 0.7260(5)  | 0.6657(6)  | 0.5559(3)  | 0.119(4)  |
| F26  | 0.6803(5)  | 0.7301(6)  | 0.4969(3)  | 0.090(3)  |
| F27  | 0.7455(7)  | 0.6097(7)  | 0.4927(6)  | 0.155(6)  |
| F28  | 0.8465(5)  | 0.6108(6)  | 0.5035(3)  | 0.107(4)  |
| F29  | 0.7801(8)  | 0.7312(7)  | 0.5088(5)  | 0.138(5)  |
| F30  | 0.8016(8)  | 0.6770(7)  | 0.4439(3)  | 0.150(5)  |
| F31  | 0.4730(19) | 0.3898(19) | 0.2636(7)  | 0.272(16) |
| F32  | 0.6061(14) | 0.361(2)   | 0.2459(9)  | 0.32(2)   |
| F33  | 0.516(2)   | 0.4841(12) | 0.2469(8)  | 0.290(18) |
| N1   | 0.6454(6)  | 0.2034(5)  | 0.1440(3)  | 0.037(2)  |
| N2   | 0.7102(5)  | 0.5170(5)  | 0.1092(3)  | 0.035(2)  |

|     |             |             |              |             |
|-----|-------------|-------------|--------------|-------------|
| N3  | 0.3380(5)   | 0.5843(5)   | 0.1406(3)    | 0.030(2)    |
| N4  | 0.5293(6)   | 0.2211(5)   | 0.3822(4)    | 0.043(2)    |
| N5  | 0.2434(5)   | 0.5860(5)   | 0.3907(3)    | 0.036(2)    |
| N6  | 0.6201(5)   | 0.5310(5)   | 0.3525(3)    | 0.033(2)    |
| O1  | 0.5993(4)   | 0.4174(4)   | 0.0319(2)    | 0.0265(16)  |
| O2  | 0.4413(4)   | 0.4400(4)   | 0.4741(2)    | 0.0290(16)  |
| P1  | 0.5835(2)   | 0.08677(18) | 0.14802(12)  | 0.0444(8)   |
| P2  | 0.7958(2)   | 0.0802(2)   | 0.17486(15)  | 0.0548(10)  |
| P3  | 0.8874(2)   | 0.4578(2)   | 0.10212(17)  | 0.0689(12)  |
| P4  | 0.6661(2)   | 0.6798(2)   | 0.13156(17)  | 0.0609(11)  |
| P5  | 0.24000(19) | 0.75699(19) | 0.14867(12)  | 0.0438(8)   |
| P6  | 0.18832(18) | 0.55825(18) | 0.17415(12)  | 0.0395(7)   |
| P7  | 0.6751(3)   | 0.0845(2)   | 0.40013(15)  | 0.0603(10)  |
| P8  | 0.4667(2)   | 0.12304(18) | 0.35288(12)  | 0.0454(8)   |
| P9  | 0.08982(18) | 0.57181(18) | 0.40072(12)  | 0.0400(8)   |
| P10 | 0.1726(2)   | 0.7517(2)   | 0.35740(17)  | 0.0650(11)  |
| P11 | 0.59991(19) | 0.6933(2)   | 0.33413(13)  | 0.0479(9)   |
| P12 | 0.8038(2)   | 0.45981(19) | 0.32139(13)  | 0.0490(9)   |
| P13 | 0.6478(4)   | 0.1113(4)   | 0.7604(2)    | 0.111(2)    |
| P14 | 0.9113(4)   | 0.2259(4)   | 0.0145(2)    | 0.1008(19)  |
| P15 | 0.6565(2)   | 0.3053(2)   | 0.49235(14)  | 0.0549(9)   |
| P16 | 0.4648(2)   | 0.32699(19) | 0.02585(13)  | 0.0457(8)   |
| P17 | 0.7652(2)   | 0.6689(2)   | 0.49937(12)  | 0.0555(10)  |
| P18 | 0.5308(18)  | 0.4119(16)  | 0.2529(4)    | 0.305(11)   |
| Pt1 | 0.68180(3)  | 0.09190(2)  | 0.167552(17) | 0.03702(12) |
| Pt2 | 0.77401(3)  | 0.56652(3)  | 0.118802(16) | 0.03382(12) |
| Pt3 | 0.21848(2)  | 0.65436(2)  | 0.166388(15) | 0.03088(11) |
| Pt4 | 0.57390(3)  | 0.10816(3)  | 0.371686(18) | 0.04387(14) |
| Pt5 | 0.13690(3)  | 0.65797(3)  | 0.375670(16) | 0.03433(12) |
| Pt6 | 0.70089(3)  | 0.57490(3)  | 0.323357(15) | 0.03308(12) |
