# Supplementary material
Source: PubMed Central journal article supplement (PMC122697)
Supplement: pnas_012540799_2.pdf [file pnas_012540799_2.pdf]

**Table 3. Selected bond distances and bond angles for 3a**

|            |           |             |            |
|------------|-----------|-------------|------------|
| C46-Pt1    | 2.027(11) | C47-Pt2     | 2.016(10)  |
| C61-Pt3    | 2.052(10) | C42-Pt4     | 2.002(12)  |
| C71-Pt5    | 2.004(11) | C57-Pt6     | 2.035(9)   |
| N1-Pt1     | 2.140(9)  | N2-Pt2      | 2.130(8)   |
| N3-Pt3     | 2.098(9)  | N4-Pt4      | 2.114(9)   |
| N5-Pt5     | 2.136(9)  | N6-Pt6      | 2.127(8)   |
| P1-Pt1     | 2.340(3)  | P2-Pt1      | 2.326(4)   |
| P3-Pt2     | 2.316(4)  | P4-Pt2      | 2.315(4)   |
| P5-Pt3     | 2.325(3)  | P6-Pt3      | 2.321(3)   |
| P7-Pt4     | 2.317(4)  | P8-Pt4      | 2.327(3)   |
| P9-Pt5     | 2.328(3)  | P10-Pt5     | 2.321(4)   |
| P11-Pt6    | 2.329(4)  | P12-Pt6     | 2.312(4)   |
| C1-N1      | 1.311(14) | C5-N1       | 1.345(14)  |
| C6-N2      | 1.342(14) | C10-N2      | 1.335(13)  |
| C11-N3     | 1.360(14) | C15-N3      | 1.366(13)  |
| C17-N4     | 1.351(14) | C21-N4      | 1.323(15)  |
| C22-N5     | 1.351(14) | C26-N5      | 1.347(14)  |
| C27-N6     | 1.357(13) | C31-N6      | 1.324(13)  |
| C16-O1     | 1.438(11) | C32-O2      | 1.441(11)  |
| C75-P1     | 1.841(14) | C81-P2      | 1.851(18)  |
| C87-P3     | 1.98(2)   | C93-P4      | 1.807(13)  |
| C99-P5     | 1.799(14) | C105-P6     | 1.828(13)  |
| C111-P7    | 1.842(16) | C117-P8     | 1.865(14)  |
| C123-P9    | 1.855(12) | C129-P10    | 1.847(14)  |
| C135-P11   | 1.856(15) | C141-P12    | 1.751(17)  |
| N7-O5      | 1.22(2)   | N7-O4       | 1.24(3)    |
| N7-O3      | 1.23(3)   | F1-P13      | 1.495(18)  |
| F2-P13     | 1.525(17) | F3-P13      | 1.560(16)  |
| F4-P13     | 1.526(15) | F5-P13      | 1.501(15)  |
|            |           |             |            |
| C46-Pt1-N1 | 175.4(4)  | C46-Pt1-P2  | 88.0(3)    |
| N1-Pt1-P2  | 93.1(3)   | C46-Pt1-P   | 186.5(3)   |
| N1-Pt1-P1  | 91.6(3)   | P2-Pt1-P1   | 168.72(14) |
| C47-Pt2-N2 | 173.8(4)  | C47-Pt2-P4  | 89.4(3)    |
| N2-Pt2-P4  | 91.7(3)   | C47-Pt2-P3  | 87.1(3)    |
| N2-Pt2-P3  | 91.4(3)   | P4-Pt2-P3   | 175.55(15) |
| C61-Pt3-N3 | 173.6(4)  | C61-Pt3-P6  | 88.4(3)    |
| N3-Pt3-P6  | 91.6(2)   | C61-Pt3-P5  | 87.4(3)    |
| N3-Pt3-P5  | 91.7(2)   | P6-Pt3-P5   | 170.97(12) |
| C42-Pt4-N4 | 175.2(4)  | C42-Pt4-P7  | 86.8(4)    |
| N4-Pt4-P7  | 89.7(3)   | C42-Pt4-P8  | 89.5(4)    |
| N4-Pt4-P8  | 93.6(3)   | P7-Pt4-P8   | 171.90(13) |
| C71-Pt5-N5 | 175.5(4)  | C71-Pt5-P10 | 91.1(3)    |
| N5-Pt5-P10 | 90.4(3)   | C71-Pt5-P9  | 85.6(3)    |
| N5-Pt5-P9  | 92.5(2)   | P10-Pt5-P9  | 173.88(15) |
| C57-Pt6-N6 | 173.5(4)  | C57-Pt6-P12 | 87.5(3)    |
| N6-Pt6-P12 | 90.9(3)   | C57-Pt6-P11 | 90.0(3)    |
| N6-Pt6-P11 | 90.8(3)   | P12-Pt6-P11 | 172.67(13) |
| N1-C1-C2   | 122.5(10) | N2-C6-C7    | 122.9(10)  |
| N3-C11-C12 | 123.5(10) | N4-C17-C18  | 122.6(11)  |
| N5-C22-C23 | 120.8(11) | N6-C27-C28  | 121.6(10)  |
| C1-N1-C5   | 118.0(10) | C1-N1-Pt1   | 123.5(8)   |
| C10-N2-C6  | 118.0(9)  | C10-N2-Pt2  | 123.2(7)   |
| C11-N3-C15 | 115.3(9)  | C11-N3-Pt3  | 119.2(7)   |
| C21-N4-C17 | 116.6(10) | C21-N4-Pt4  | 120.3(7)   |
| C26-N5-C22 | 118.1(10) | C26-N5-Pt5  | 121.8(7)   |
| C31-N6-C27 | 117.4(9)  | C31-N6-Pt6  | 125.4(7)   |
| O5-N7-O4   | 118(3)    | O5-N7-O3    | 122(4)     |
| C77-P1-C79 | 107.2(6)  | C77-P1-Pt1  | 114.2(5)   |

|               |           |              |           |
|---------------|-----------|--------------|-----------|
| C85-P2-C83    | 106.4(7)  | C85-P2-Pt1   | 118.1(5)  |
| C91-P3-C89    | 108.0(13) | C91-P3-Pt2   | 115.4(7)  |
| C97-P4-C93    | 108.6(8)  | C97-P4-Pt2   | 116.3(7)  |
| C99-P5-C101   | 103.6(7)  | C99-P5-Pt3   | 113.4(5)  |
| C105-P6-C109  | 103.8(7)  | C105-P6-Pt3  | 110.4(5)  |
| C113-P7-C111  | 103.7(9)  | C113-P7-Pt4  | 113.1(5)  |
| C119-P8-C121  | 106.2(7)  | C119-P8-Pt4  | 112.2(5)  |
| C127-P9-C125  | 103.4(6)  | C127-P9-Pt5  | 116.5(5)  |
| C133-P10-C131 | 95(2)     | C133-P10-Pt5 | 114.4(9)  |
| C139-P11-C137 | 107.9(9)  | C139-P11-Pt6 | 116.2(6)  |
| C145-P12-C141 | 104.5(17) | C145-P12-Pt6 | 111.9(10) |
| F1-P13-F5     | 99.3(16)  | F2-P13-F3    | 83.3(10)  |
| F3-P13-F6     | 85.5(11)  | F4-P13-F2    | 89.2(10)  |
| F5-P13-F4     | 96.6(10)  | F8-P14-F12   | 92.5(12)  |
