# Supplementary material
Source: PubMed Central journal article supplement (PMC122697)
Supplement: pnas_012540799_3.pdf [file pnas_012540799_3.pdf]

**Table 4. Atomic coordinates and  $U_{eq}$  for 3c**

| atom | x          | y          | z            | $U_{eq}$  |
|------|------------|------------|--------------|-----------|
| Pt1  | 0.10050(3) | 0.74584(3) | 0.031463(16) | 0.0919(5) |
| P1   | 0.0624(3)  | 0.7905(3)  | 0.01667(16)  | 0.133(2)  |
| P2   | 0.1475(3)  | 0.7084(3)  | 0.04049(18)  | 0.137(3)  |
| P3   | 0.0578(4)  | 0.6667     | 0.9167       | 0.141(4)  |
| C1   | -0.3333    | 0.3333     | -0.0549(8)   | 0.106(13) |
| C2   | -0.3333    | 0.3333     | -0.0257(6)   | 0.068(7)  |
| C3   | -0.2826(6) | 0.3790(6)  | -0.0155(3)   | 0.071(4)  |
| C4   | -0.2421(8) | 0.3924(7)  | -0.0293(4)   | 0.106(7)  |
| C5   | -0.1933(7) | 0.4334(8)  | -0.0204(5)   | 0.123(8)  |
| C6   | -0.1901(7) | 0.4603(7)  | 0.0003(4)    | 0.087(5)  |
| C7   | -0.2353(7) | 0.4459(8)  | 0.0141(4)    | 0.095(5)  |
| C8   | -0.2793(7) | 0.4067(8)  | 0.0061(4)    | 0.092(6)  |
| C9   | -0.1435(8) | 0.5032(7)  | 0.0074(5)    | 0.103(7)  |
| C10  | -0.1022(8) | 0.5400(8)  | 0.0118(5)    | 0.101(6)  |
| C11  | -0.0549(8) | 0.5841(8)  | 0.0170(5)    | 0.101(6)  |
| C12  | -0.0170(9) | 0.6053(8)  | -0.0007(5)   | 0.103(6)  |
| C13  | 0.0254(8)  | 0.6537(11) | 0.0055(8)    | 0.144(12) |
| C14  | 0.0016(8)  | 0.6535(8)  | 0.0428(4)    | 0.113(7)  |
| C15  | -0.0444(8) | 0.6085(10) | 0.0401(5)    | 0.119(8)  |
| C16  | 0.1631(9)  | 0.8143(8)  | 0.0370(5)    | 0.117(7)  |
| C17  | 0.1940(10) | 0.8367(9)  | 0.0155(4)    | 0.133(9)  |
| C18  | 0.2395(12) | 0.8827(12) | 0.0143(6)    | 0.168(13) |
| C19  | 0.2531(13) | 0.9073(11) | 0.0392(7)    | 0.164(15) |
| C20  | 0.2281(9)  | 0.8861(8)  | 0.0610(4)    | 0.104(7)  |
| C21  | 0.1805(7)  | 0.8405(7)  | 0.0602(4)    | 0.088(5)  |
| C22  | 0.1565(8)  | 0.8231(8)  | 0.0833       | 0.083(7)  |
| C23  | 0.2468(9)  | 0.9134(9)  | 0.0833       | 0.131(13) |
| C24  | 0.0817(16) | 0.8513(16) | 0.0343(8)    | 0.208(16) |
| C25  | 0.130(4)   | 0.895(3)   | 0.0152(17)   | 0.41(5)   |
| C26  | 0.076(2)   | 0.801(3)   | -0.0151(12)  | 0.30(3)   |
| C27  | 0.071(2)   | 0.772(2)   | -0.0364(13)  | 0.28(3)   |
| C28  | -0.017(3)  | 0.749(2)   | 0.0203(12)   | 0.32(3)   |
| C29  | 0.2026(18) | 0.7480(18) | 0.0609(9)    | 0.254(19) |
| C30  | 0.234(2)   | 0.718(2)   | 0.0615(10)   | 0.29(2)   |
| C31  | 0.113(3)   | 0.650(3)   | 0.0580(15)   | 0.37(4)   |
| C32  | 0.190(3)   | 0.713(3)   | 0.0045(12)   | 0.31(3)   |
| C33  | 0.164(2)   | 0.695(2)   | -0.0094(10)  | 0.24(2)   |
| N1   | 0.0343(6)  | 0.6746(7)  | 0.0246(3)    | 0.098(6)  |
| F1   | 0.0258(9)  | 0.6771(9)  | 0.9376(4)    | 0.206(8)  |
| F4   | 0.0923(12) | 0.6663(12) | 0.9395(6)    | 0.260(11) |
| F3   | 0.110(2)   | 0.718(2)   | 0.9242(10)   | 0.36(2)   |
| F2   | 0.089(3)   | 0.749(3)   | 0.9336(18)   | 0.51(4)   |
| F5   | 0.0718(15) | 0.7146(15) | 0.9047(7)    | 0.302(14) |
