# Supplementary material
Source: PubMed Central journal article supplement (PMC122697)
Supplement: pnas_012540799_4.pdf [file pnas_012540799_4.pdf]

**Table 5. Selected bond distances (Å) and bond angles (°) for 3c**

|            |           |            |           |
|------------|-----------|------------|-----------|
| Pt1-C16    | 2.04(2)   | Pt1-N1     | 2.143(16) |
| Pt1-P1     | 2.337(8)  | Pt1-P2     | 2.300(8)  |
| P1-C24     | 1.89(4)   | P1-C26     | 1.70(6)   |
| P1-C28     | 2.13(7)   | P2-C29     | 1.85(5)   |
| P2-C31     | 1.82(8)   | P2-C32     | 2.25(7)   |
| C3-C4      | 1.31(2)   | C3-C2      | 1.580(18) |
| C2-C1      | 1.53(5)   | C2-C3      | 1.580(18) |
| C9-C10     | 1.23(3)   | C9-C6      | 1.43(3)   |
| C6-C5      | 1.34(3)   | C6-C7      | 1.43(3)   |
| N1-C13     | 1.15(3)   | N1-C14     | 1.30(3)   |
| P3-F5      | 1.45(4)   | P3-F3      | 1.64(5)   |
| P3-F1      | 1.61(2)   | P3-F4      | 1.60(3)   |
| C16-Pt1-N1 | 178.3(9)  | C16-Pt1-P2 | 89.0(8)   |
| N1-Pt1-P2  | 92.1(5)   | C16-Pt1-P1 | 86.1(7)   |
| N1-Pt1-P1  | 92.6(5)   | P2-Pt1-P1  | 170.3(3)  |
| C24-P1-Pt1 | 114.5(14) | C26-P1-Pt1 | 107(2)    |
| C29-P2-Pt1 | 112.7(16) | C31-P2-Pt1 | 113(2)    |
| C24-P1-C26 | 112(3)    | C24-P1-C28 | 105(2)    |
| C29-P2-C31 | 105(3)    | C29-P2-C32 | 98(2)     |
| C13-N1-C14 | 117(2)    | C13-N1-Pt1 | 124(2)    |
| C14-N1-Pt1 | 119.3(13) | F1-P3-F1   | 89.5(18)  |
| F3-P3-F3   | 120(4)    | F5-P3-F5   | 156(3)    |
| F1-P3-F5   | 89.6(17)  | F3-P3-F5   | 137(2)    |
