# Supplementary material
Source: PubMed Central journal article supplement (PMC122697)

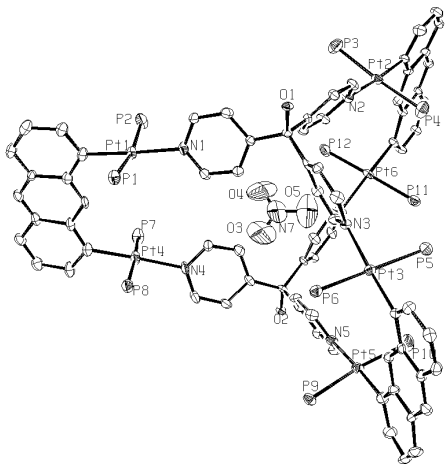

Supplement: pnas_012540799_7.pdf [file pnas_012540799_7.pdf]

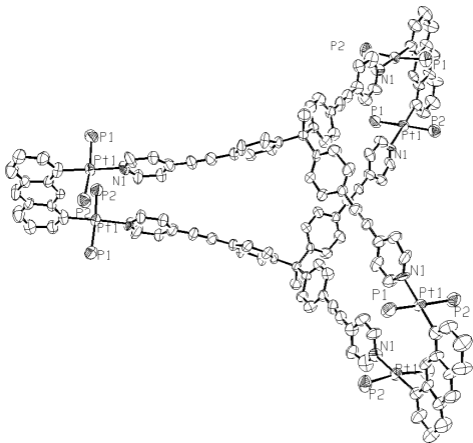

Supplement: pnas_012540799_8.pdf [file pnas_012540799_8.pdf]
